# Supplementary material for: Long Noncoding RNA 00473 Is Involved in Preeclampsia by LSD1 Binding-Regulated TFPI2 Transcription in Trophoblast Cells
Source: PubMed Central journal article supplement — Mol Ther Nucleic Acids. 2018 Jul 6;12:381–92. doi: 10.1016/j.omtn.2018.05.020 (PMC6036867; doi:10.1016/j.omtn.2018.05.020), 2018-07-06
Supplement: mmc1.pdf [file mmc1.pdf]

**OMTN, Volume 12**

**Supplemental Information**

**Long Noncoding RNA 00473 Is Involved  
in Preeclampsia by LSD1 Binding-Regulated  
TFPI2 Transcription in Trophoblast Cells**

**Dan Wu, Yetao Xu, Yanfen Zou, Qing Zuo, Shiyun Huang, Sailan Wang, Xiyi Lu, Xuezhi He, Jing Wang, Tianjun Wang, and Lizhou Sun**

**Table S1 Sequence of primers and siRNAs.**

| <b>Primers</b>                           | <b>sequence(5'-3')</b>     |
|------------------------------------------|----------------------------|
| GAPDH F                                  | GGGAGCCAAAAGGGTCAT         |
| GAPDH R                                  | GAGTCCTTCCACGATACCAA       |
| linc00473 F                              | GAGTCGTTCCCTGAGAGCACA      |
| linc00473 R                              | CTCCTTCCCTCCTTTCCATC       |
| EZH2 F                                   | TGCACATCCTGACTTCTGTG       |
| EZH2 R                                   | AAGGGCATTACCAACTCC         |
| LSD1 F                                   | AGCGCCTACGCTGTCAAAG        |
| LSD1 R                                   | CTCAAAGTGGTGCGAAAAACG      |
| RND3 F                                   | GCTCCATGTCTTCGCCAAG        |
| RND3 R                                   | AAAAGTGGCCGTGTAATTCTCA     |
| TFPI2 F                                  | CTGGGGCTGTGCGATTCTGC       |
| TFPI2 R                                  | TCTCCGCGTTATTTCTGTTG       |
| SPRY2 F                                  | GCGATCACGGAGTTCAG          |
| SPRY2 R                                  | GTGGAGTCTCTCGTGT           |
| SPRY4 F                                  | CCAGGATGTCACCCACCATTG      |
| SPRY4 R                                  | TGTGCTGCTGCTGCTC           |
| TNFAIP3 F                                | AGTGTGTCAGCATCCCAACCA      |
| TNFAIP3 R                                | CCGGTTAGCCATACATCTGC       |
| KLF10 F                                  | AAGCTCAGGCAACAAGTGTG       |
| KLF10 R                                  | AGCGGCACATGGTATGTTCT       |
| TMEM158 F                                | CTCCAATGCTTCAGTCAACG       |
| TMEM158 R                                | AGAGCAGTAGGTGCGACTGG       |
| NDRG1 F                                  | TTCCCTGGCCTTGAGTAGAA       |
| NDRG1 R                                  | TCCGCTGCAAAGTTACAAAT       |
| U1 F                                     | GGGAGATACCATGATCACGAAGGT   |
| U1 R                                     | CCACAAATTATGCAGTCGAGTTTCCC |
| <b>primers of NCALD promotor regions</b> |                            |
| TFPI2 1F                                 | GCCTTTGAGGATTCTGGGGG       |
| TFPI2 1R                                 | GGCTACATGGGAGACGAAGG       |
| TFPI2 2F                                 | TTTGAGGATTCTGGGGGCTC       |
| TFPI2 2R                                 | GGGAGACGAAGGGAGCAAAT       |
| TFPI2 3F                                 | CTTTGAGGATTCTGGGGGCTC      |
| TFPI2 3R                                 | TGGGAGACGAAGGGAGCAAA       |
| TFPI2 4F                                 | AGAGCCTTTGAGGATTCTGGG      |
| TFPI2 4R                                 | TTGGCTACATGGGAGACGAAG      |

|            |                       |
|------------|-----------------------|
| TNFAIP3 1F | ATGAGAGGAAACAGGCCAACT |
| TNFAIP3 1R | GCCAAACACGGACCTTAGAC  |
| TNFAIP3 2F | GAGAGGAAACAGGCCAACTCT |
| TNFAIP3 2R | AACAGCCAAACACGGACCTTA |
| TNFAIP3 3F | TGAGAGGAAACAGGCCAACTC |
| TNFAIP3 3R | AACAGCCAAACACGGACCTT  |
| TNFAIP3 4F | GAGGAAACAGGCCAACTCTGT |
| TNFAIP3 4R | AGCCAAACACGGACCTTAGA  |

**siRNA**

|                 |                           |
|-----------------|---------------------------|
| si-LSD1         | GGUCUUAUCAACUUCGGCAUCUAUA |
| si-linc00473-1# | GCGCCGGGAGAUCAUCACGAUGAA  |
| si-linc00473-2# | GGAACUUUCCGAGAGGGCGUGUUGU |
| si-linc00473-3# | CCCUGUCUGCAAAGAUCAGUUUAA  |
| si-TFPI2-1#     | UCUACUGGCAAAGCGAAGCUUUGGC |
| si-TFPI2-2#     | UGCACAUGCACGUUUGCAAUCCUCC |

---
